# Supplementary material
Source: PubMed Central journal article supplement (PMC4382041)
Supplement: supp_3.1.E15_Original_submission.pdf [file supp_3.1.E15_Original_submission.pdf]

1  
2  
3 Chronic Obstructive Pulmonary Disease in Canadian Primary Care: A CPCSSN Study  
4

5 Michael E. Green, MD, MPH  
6 Associate Professor  
7 Departments of Family Medicine and Public Health Sciences  
8 Centre for Studies in Primary Care  
9 Queen's University, Kingston Ontario  
10  
11

12 Nandini Natajaran, MD  
13 Network Director of the Maritime Family Practice Research Network (MaRNet-FP)  
14 Associate Professor  
15 Department of Family Medicine  
16 Dalhousie University, Halifax, Nova Scotia  
17  
18

19 Denis E. O'Donnell, MD  
20 Professor  
21 Divisions of Respiriology and Critical Care Medicine  
22 Department of Medicine  
23 Queen's University, Kingston, Ontario  
24  
25

26 Tyler Williamson, PhD  
27 Senior Epidemiologist  
28 Canadian Primary Care Sentinel Surveillance Network  
29 Centre for Studies in Primary Care  
30 Queen's University  
31  
32

33 Jyoti Kotecha, MPA, MRSC, CChem  
34 Assistant Director  
35 Adjunct Assistant Professor  
36 Centre for Studies in Primary Care  
37 Dept of Family Medicine  
38 Queen's University, Kingston, Canada  
39  
40

41 Shahriar Khan, MSc  
42 Senior Data Analyst  
43 Canadian Primary Care Sentinel Surveillance Network  
44 Centre for Studies in Primary Care  
45 Queen's University, Kingston, Ontario  
46  
47

48 Andrew Cave, MB ChB, MCISc,  
49 Professor  
50 Department of Family Medicine  
51 University of Alberta, Edmonton, Alberta  
52  
53

54  
55 Correspondence  
56 Dr. Michael E. Green [michael.green@dfm.queensu.ca](mailto:michael.green@dfm.queensu.ca)  
57  
58  
59  
60

## Abstract

**Background:** Chronic Obstructive Pulmonary Disease (COPD) is a significant source of morbidity and mortality in Canada. Although, it is primarily managed within primary care there is little Canadian evidence on the prevalence or management of COPD in this setting.

**Methods:** Electronic Medical Record data was obtained from the Canadian Primary Care Sentinel Surveillance Network (CPCSSN) at the end of 2012. Validated case finding algorithms were used to identify COPD cases. Descriptive statistics and multivariate modeling analyses were used to calculate the prevalence of COPD, its association with key demographic factors and co-morbidities and patterns of medication prescribing.

**Results:** Observed prevalence of COPD is 4.0%, representing a population prevalence of 3.4% using age-sex standardization. Co-morbidity was the common with prevalence ratios ranging from 1.12 for presence of a single co-morbid condition to 1.9 for 4 or more co-morbid conditions. Anticholinergic agents(63%) , short(48%) and long acting(38%) beta agonists and inhaled corticosteroids(41%) were the most commonly used medications.

**Interpretation:** The prevalence of physician diagnosed COPD in Canadian primary care practices identified by the CPCSSN algorithms is similar to that reported in other practice-based studies at approximately 3-4%. Most patients have co-morbid conditions and are on multiple medications. This suggests early milder disease is often not diagnosed. Compared to other data sources EMR data has the potential to provide more specific estimates without compromising sensitivity and to also provide more complete information on treatment practices.

## Background:

Chronic Obstructive Pulmonary Disease (COPD) is a significant source of morbidity and mortality in Canada and globally. Estimates place the worldwide prevalence at 9-10% from physiological based studies and 3-8% from studies based on physician or patient reported diagnosis or symptoms.<sup>1,2</sup> Globally, it is rated as the 5th leading cause of death, and 9<sup>th</sup> in contributions to Disability Adjusted Life Years lost.<sup>3,4</sup> A recent systematic review of COPD epidemiology worldwide identified 12 Canadian studies which produced prevalence estimates that ranged from 3-12% depending on the method used.<sup>5</sup> Canadian data from a study using spirometry to screen a population based sample suggest a rate of about 10%.<sup>6</sup> There is limited data on COPD either alone or in combination with other chronic diseases from primary care settings.

In other countries, the limited reports on COPD prevalence in primary care settings show marked variation depending on the method of identification of illness. A UK study based on electronic records in the Computerized Patient Records Database (CPRD) found the prevalence of physician diagnosed COPD to be less than 1% for women and only 1.35% for men.<sup>7</sup> Another UK practice based research network study that invited subjects participating in a postal survey to come for spirometry if they had either symptoms or a smoking history found a much higher prevalence (4.1% overall, 9.6% in patients over 40).<sup>8</sup> A recent Spanish study using data from electronic medical records found a physician diagnosed prevalence of 3.2%, 90% of whom were also found to have at least one co-morbid condition.<sup>9</sup>

Our current understanding of the extent of COPD in Canada and its impact on health and health systems is not based on primary care data, but is based on data from large population health surveys or from administrative data.. However, COPD is primarily managed within the primary care sector. The Canadian Primary Care Sentinel Surveillance Network (CPCSSN) was established in 2008 to bring together practice based research networks using diverse electronic medical record systems to generate data on chronic disease in Canadian primary care settings. COPD is one of the eight common chronic conditions targeted by CPCSSN. This study was undertaken to (1) explore the prevalence of COPD,(2) the degree of co-morbidity with respect to the other conditions for which CPCSSN has validated algorithms and (3) common patterns of treatment of COPD by Canadian primary care physicians.

## Methods:

### *Data sources and study population:*

CPCSSN is a national network of practice based research networks whose member primary care practices use various electronic medical records. Its overall architecture and approach have been described in detail elsewhere.<sup>10,11</sup> This study used CPCSSN data extracted on Dec 31, 2012. At the time there were 444 physicians in 10 networks covering 8 provinces of Canada using 12 different EMRs. Case finding algorithms have been established for eight chronic diseases including COPD and

1  
2  
3 validated against chart abstraction and physician identification of cases.<sup>12,13,14</sup> For  
4 COPD the CPCSSN algorithms have a sensitivity of 82% and specificity of 97%.<sup>13</sup> This  
5 study population has been shown elsewhere to be reasonably representative of the  
6 primary care population in Canada.<sup>15</sup> We estimated the prevalence using the  
7 denominator described by Griever et. al. as it approximates the general population while  
8 the 24 -month contact group. approximates those attending the practice.<sup>16</sup>  
9  
10

### 11 *Statistical analysis*

12  
13  
14 We used a combination of descriptive statistics and multivariate modeling for data  
15 analysis using SAS statistical software version 9.3.<sup>17</sup> We first calculated the prevalence  
16 rates for COPD, classified by an appropriate age group and gender. As COPD is  
17 primarily a disease of older adults we limit our reporting here to adults 40 years of age or  
18 older. We also calculated age-sex standardized prevalence rates according to Canadian  
19 national age-sex distribution (Census 2011).<sup>18</sup> We then looked at the prevalence ratios by  
20 three risk factors: rural postal code of clinic (second digit of the postal code being zero),  
21 BMI categories (underweight: BMI<18, normal: 18≤BMI<25, overweight: 25≤BMI<30  
22 and obese≥30), and smoking (never, past, current). Three separate log-binomial  
23 regression analyses were carried out to calculate prevalence ratios, each controlling for  
24 age and sex of the study population. Along with prevalence ratios (PRs), the  
25 corresponding 95% confidence intervals (CI) and p-values were also reported. We then  
26 analyzed the presence of each of the other CPCSSN comorbid conditions, adjusting for  
27 age and sex, using the same log-binomial approach and then expressing the results in  
28 terms of prevalence ratios, 95% CI and p-values. In addition, we looked at the cumulative  
29 proportion of patients diagnosed with one or more of the other CPCSSN conditions, with  
30 respect to the absence and presence of the index condition in question. Also, we  
31 calculated the average number of comorbid conditions by age group. Finally we  
32 investigated the medication data by analysing the pattern of medication use by those who  
33 were diagnosed with COPD. In this report, medication use for a particular medication  
34 means that there is at least one prescription for that medication somewhere in the  
35 patient's electronic medical record.  
36  
37  
38  
39  
40  
41

### 42 **Results:**

43  
44  
45 Table 1/Figure 1 presents the age-sex distribution of our sample population and  
46 the prevalence of COPD. The overall observed prevalence is 4.0%, which represents a  
47 prevalence of 3.4% using standard age-sex standardization or 3.2% using the CPCSSN  
48 general population denominator. Diagnosis of COPD was associated with rural location  
49 (PR=1.22 95% CI 1.17-1.28), current (PR=7.09 95% CI 7.3-8.5) and past (PR=3.25 95%  
50 CI=3.01-3.51) smoking, and weight category other than normal (Underweight PR=1.35  
51 95% CI 1.1.21-1.50; Overweight PR=0.90 95% CI .85-.96; Obese PR=1.17 95% CI 1.10-  
52 1.23).  
53  
54

55  
56 Information on co-morbidity with other CPCSSN conditions is presented in  
57 Tables 2 and 3, and Figure 2. Table 2 presents the prevalence ratios for the presence of  
58  
59  
60

the other chronic diseases identified by CPCSSN for patients with a CPCSSN diagnosis of COPD in comparison to those who do not have COPD. Patients with COPD are more likely to receive a CPCSSN diagnosis of every other condition except Parkinsonism. Table 3 reports both the prevalence of co-morbidity with one or more other CPCSSN condition for COPD patients and the prevalence ratios for multimorbidity in COPD patients as compared to other CPCSSN patients who have at least one chronic disease. Of all COPD patients, 76.7% had one or more other chronic conditions and 3.2% had 4 or more other conditions. Prevalence ratios for co-morbidity were all greater than one, ranging from 1.12 for presence of a single co-morbid condition to 1.9 for 4 or more co-morbid conditions. Figure 2 shows the mean number of co-morbid conditions and the prevalence ratios by age and sex for COPD patients compared to other chronic disease patients. Co-morbidity is higher for COPD for all age groups with the prevalence ratio being highest in the younger age groups and diminishing with increasing age.

Tables 4 and 5 present information on prescribed medications for treatment of COPD. Table 4 provides the prevalence of prescriptions for various therapeutic agents by class and drug. Table 5 presents data on patterns of drugs prescribed. Table 5a presents data on the numbers of drug classes used and table 5b provides additional detail on the class combinations.

### Interpretation:

**Prevalence** In this study the estimated prevalence of COPD overall for adults over 40 in primary care practices was 3.4% using age-sex standardization. This is similar to the rate (3.2%) reported by Garcia-Olmos et al. in a recent EMR based study in primary care practices in Spain.<sup>9</sup> It is lower than rates of 9-10% expected based on population based studies using physiologic measures.<sup>2,6,19</sup> This difference is in keeping with past studies finding COPD to be underdiagnosed or misdiagnosed quite frequently. Frank et al (2006) found that less than half of patients with GOLD categories 2-4 lung disease by spirometry had a diagnosis of COPD recorded in their primary care medical records.<sup>20</sup> Prevalence rates based on administrative data may be biased in the opposite direction. Lacasse et al. conducted a large validation of COPD as recorded in administrative data from Quebec and found a diagnosis of COPD as the principal diagnosis for hospital discharges to have a PPV of only 50.4% in identifying “true cases” as assessed by specialist physician review of hospital records.<sup>21</sup> Gerhsorn et al. (2009) also validated their administrative data definition of COPD against a chart review and found a sensitivity of 85% and specificity of 78.4 % for the most inclusive definition, which was subsequently adopted by this group, as more restricted definitions had poor sensitivity.<sup>22</sup> In comparison the CPCSSN case finding algorithm for COPD has a sensitivity of 82% while retaining a high specificity of 97%.<sup>13</sup> This may explain in part the significant differences between the rates observed in our data and the prevalence of almost 12% in adults over age 35 reported most recently by this research group.<sup>23,24</sup> The true prevalence is likely found between these levels. A recent study by Muggah et al (2013) also showed poor agreement between data from a large population health survey and the administrative data definition used in Ontario (kappa =.29, prevalence 11.1% HA

1  
2  
3 data, 5.6% self-reported).<sup>25</sup> These large gaps highlight the issues raised by Manuel et al  
4 and Green et al on the importance of looking closely at the biases inherent in data sources  
5 when interpreting the results of even well designed studies and surveillance systems that  
6 exploit our ability to access data that is generated during the provision of health care  
7 services.<sup>26,27</sup> In our findings, the prevalence is similar for men and women in younger  
8 age categories, but significantly higher among men for all age groups over age 60. This  
9 may be related to historical differences in smoking rates in addition to other factors.  
10  
11

12  
13 **Co-morbidities** Levels of co-morbidity were very high, with 76.7% of COPD  
14 patients having at least one additional CPCSSN identified condition. Real rates of co-  
15 morbidity are likely even higher as CPCSSN currently only flags a limited number of  
16 conditions. Co-morbidity for COPD patients was significantly higher than that  
17 experienced by other chronic disease patients, particularly for those who are younger.  
18 This is consistent with the limited number of prior studies of this issue that also found  
19 most COPD patients had other co-morbid chronic conditions.<sup>2,28</sup> For example, in the  
20 Spanish study that also used EMR data as a source and which included a much more  
21 comprehensive list of conditions, 90% of COPD patients had at least one co-morbid  
22 condition.<sup>9</sup> The higher prevalence ratio for co-morbidities in the younger age groups  
23 would be consistent with the notion of distinct COPD “phenotypes” in which younger  
24 patients with more severe disease are one distinct type.<sup>29</sup> This is particularly important for  
25 our conceptualization of COPD as an illness. It seldom occurs alone and should prompt a  
26 thorough assessment for the presence of other chronic conditions.  
27  
28  
29

30  
31 **Medications** The current Canadian guidelines for management of COPD  
32 recommend anticholinergic medications or long acting beta agonists, either alone or in  
33 combination, for patients with persistent symptoms. The addition of Inhaled  
34 corticosteroids-long-acting beta agonists combination to long acting anticholinergic (ie.  
35 triple therapy) should ideally be reserved for patients with moderate to severe airway  
36 obstruction who are prone to exacerbations. In selected patients who have persistent  
37 breathlessness despite optimal inhaled bronchodilators a trial of oral theophyllines might  
38 be considered. Oral anti-inflammatory agents (eg roflumilast) may be appropriate in  
39 selected patients with a chronic bronchitis phenotype who are prone to exacerbations and  
40 who have more advanced disease.<sup>30</sup> Short acting beta agonists are recommended as an  
41 adjunctive symptom relieving medication in all patients on anticholinergics who still  
42 have symptoms. In keeping with guidelines, anticholinergics were also most likely to  
43 be used alone but some patients were prescribed ICS alone raising the question of an  
44 asthma pattern of treatment or even diagnosis, some patients in the younger age groups  
45 having a mixed picture of asthma and COPD. A relatively small proportion of patients  
46 on ICS (10%) and SABAs (7%) were found to be on these agents alone, which would not  
47 be concordant with current COPD guidelines but would fit nicely with asthma  
48 guidelines. Most patients were on 2 or more classes of medications suggesting that they  
49 were GOLD class 2-4 rather than those with early, and less detected, disease.  
50  
51  
52  
53

54 **Limitations:**  
55  
56  
57  
58  
59  
60

1  
2  
3  
4  
5  
6  
7  
8  
9  
10  
11  
12  
13  
14  
15  
16  
17  
18  
19  
20  
21  
22  
23  
24  
25  
26  
27  
28  
29  
30  
31  
32  
33  
34  
35  
36  
37  
38  
39  
40  
41  
42  
43  
44  
45  
46  
47  
48  
49  
50  
51  
52  
53  
54  
55  
56  
57  
58  
59  
60

One significant limitation in our approach to using EMR data is that some information may not be accessible to the automated extraction processes used by CPCSSN (ie. such as image files, scanned reports such as pulmonary function tests or radiology reports, free text fields). In addition, CPCSSN is a voluntary network of primary care providers in Canadian primary care practices and thus may not be fully representative of the full range of patients and providers. However, the overall age sex distribution of the network's patients is comparable to national averages and adjustment measures have been used to account for this when estimating prevalence.<sup>15</sup> With respect to the reporting of co-morbidities CPCSSN currently only has validated algorithms for 8 conditions, so reporting is limited to these at the present time. Finally we are relying on physician diagnosis for COPD, which may or may not include spirometry for confirmation.

### Conclusions:

The prevalence of physician diagnosed COPD in Canadian primary care practices identified by the CPCSSN algorithms is similar to that reported in other practice-based studies at approximately 3-4%. When compared to rates of about 10% suggested by population-based samples tested by spirometry, this suggests that underdiagnosis remains a significant issue. Targeted spirometry screening for smokers at risk of COPD is one strategy that could be considered to improve this. Compared to other data sources such as administrative databases or population based surveys, EMR data has the potential to provide more specific estimates without compromising sensitivity and to also provide more complete information on treatment practices. Co-morbidity is extremely common, with most patients having at least one additional condition. Medication prescribing patterns are roughly aligned with current guidelines, but a more detailed analysis of medication combinations would be required to adequately assess this fully.

**Acknowledgements:** The Canadian Primary Care Sentinel Surveillance Network is a committee of the College of Family Physicians of Canada and is funded through a contribution agreement with the Public Health Agency of Canada. The conclusions and opinions expressed in this article are those of the authors and not necessarily of the CFPC or PHAC. This article is written by the authors on behalf of the CPCSSN network and its members. We would like to thank Rachel Morkem and the Centre for Studies in Primary Care staff for their assistance with the organization and support of the writing group.

### References:

1. Buist AS, Vollmer WM, McBurnie MA. Worldwide burden of COPD in high- and low-income countries. part I. the burden of obstructive lung disease (BOLD) initiative. *The international journal of tuberculosis and lung disease : the official journal of the International Union against Tuberculosis and Lung Disease*. 2008;**12**(7):703-.

- 1  
2  
3 2. Halbert RJ, Natoli JL, Gano A, Badamgarav E, Buist AS, Mannino DM. Global burden  
4 of COPD: Systematic review and meta-analysis. *European Respiratory Journal*.  
5 2006;**28**(3):523-32.  
6
- 7  
8 3. Murray CJL, Abdalla S, Dharmaratne SD, Aboyans V, Abraham J, Ackerman I, et al.  
9 Disability-adjusted life years (DALYs) for 291 diseases and injuries in 21 regions, 1990-  
10 2010: A systematic analysis for the global burden of disease study 2010. *Lancet*.  
11 2012;**380**(9859):2197-223.  
12
- 13  
14 4. Pauwels RA, Rabe KF. Burden and clinical features of chronic obstructive pulmonary  
15 disease (COPD). *Lancet*. 2004;**364**(9434):613-20.  
16
- 17  
18 5. Rycroft CE, Heyes A, Lanza L, Becker K. Epidemiology of chronic obstructive  
19 pulmonary disease: A literature review. *International Journal of COPD*. 2012;**2012**:457-  
20 94.  
21
- 22  
23 6. Raghavan N, Lam YM, Webb KA, Guenette J, Amaronputtisathaporn N et al.  
24 Components of the COPD Assessment Test (CAT) associated with a diagnosis of DOPD  
25 in a random population sample. *COPD* 2012; **9**: 175-183.  
26
- 27  
28 7. Soriano JB, Maier WC, Egger P, Visick G, Thakrar B, Sykes J, et al. Recent trends in  
29 physician diagnosed COPD in women and men in the UK. *Thorax*. 2000;**55**(9):789-94.  
30
- 31  
32 8. Frank TL, Hazell ML, Linehan MF, Morris JA, Frank PI. The estimated prevalence of  
33 chronic obstructive pulmonary disease in a general practice population. *Primary care  
34 respiratory journal : journal of the General Practice Airways Group*. 2007;**16**(3):169.  
35
- 36  
37 9. Garcia-Olmos L, Alberguilla A, Ayala V, Barcia-Sagredo P, Morales L et al.  
38 Comorbidity in patients with chronic obstructive pulmonary disease in family practice: a  
39 cross sectional study. *BMC Family Practice* 2013; **14**:11.  
40
- 41  
42 10. Birtwhistle R, Keshavjee K, Lambert-Lanning A, et al. Building a pan-Canadian  
43 primary care sentinel surveillance network: initial development and moving forward. *J  
44 Am Board Fam Med* 2009;**22**:412-22.  
45
- 46  
47 11. Birtwhistle RV. Canadian Primary Care Sentinel Surveillance Network: A developing  
48 resource for family medicine and public health. *Canadian Family Physician*  
49 2011;**57**:1219-20.  
50
- 51  
52 12. Kadhim-Saleh A, Green ME, Williamson T, Hunter D and Birtwhistle RV.  
53 Validation of the diagnostic algorithms for five chronic conditions in the Canadian  
54 Primary Care Sentinel Surveillance Network. *J Am Board Fam Med* 2013; **26**(2): 159-  
55 167.  
56
- 57  
58 13. Williamson T, Green ME, Birtwhistle RV, Khan S, Wong S, Garies S, Nataranjan N,  
59 Manca D and Drummond N. Expanding opportunities for using electronic medical record  
60



1  
2  
3 data: validation of eight case definitions for chronic disease surveillance in the Canadian  
4 Primary Care Sentinel Surveillance Network database. Submitted to *Annals of Family*  
5 *Medicine* Aug 2013. Accepted March 2014.  
6  
7

8 14. Natarajan N, Varatharasan N, Sabri S, Williamson T, "Is chart abstraction sufficient  
9 or is the "gold standard" of physician diagnosis needed when validating EMR case  
10 detection algorithms?", 41st North American Primary Care Research Group (NAPCRG),  
11 Ottawa, Ontario, Nov 2013.  
12

13 15. Williamson T, Lambert-Lanning A, Martin K, Leggett J, Morkam R, Khan S,  
14 Birtwhistle R. Primary Health Care Intelligence: The Canadian Primary Care Sentinel  
15 Surveillance Network (CPCSSN) 2013 Annual Report. October 15, 2013.  
16  
17

18 16. Greiver M, Williamson T, Bennett TL, et al. Developing a method to estimate  
19 practice denominators for a national Canadian electronic medical record database. *Fam*  
20 *Pract* 2013;**30**:347-54.  
21  
22

23 17. SAS System for Windows, V 9.3. Copyright 2002-2010 SAS Institute Inc, Cary, NC,  
24 USA.  
25  
26

27 18. Statistics Canada. *2011 Census of Population*, Statistics Canada Catalogue no 98-  
28 311-XCB2011018, 2011, Ottawa, Ontario, Canada.  
29  
30

31 19. *Reference to BOLD study or other– Denis or Andrew to provide* Note International  
32 overall paper would be best, Canadian results already cited. Different citation that ref #6  
33  
34

35 20. Frank TL, Frank PI, Hazell ML, Linehan MF. The diagnostic accuracies of chronic  
36 obstructive pulmonary disease (COPD) in general practice: The results of the MAGIC  
37 (manchester airways group identifying COPD) study. *Primary Care Respiratory Journal*.  
38 2006;**15**(5):286-93.  
39  
40

41 21. Lacasse Y, Daigle J, Martin S, Maltais F. Validity of chronic obstructive pulmonary  
42 disease diagnoses in a large administrative database. *Canadian respiratory journal* :  
43 *Journal of the Canadian Thoracic Society*. 2012;**19**(2):e5-E9.  
44

45 22. Gershon AS, Wang C, Guan J, Vasilevska-Ristovska J, Cicutto L, To T. Identifying  
46 individuals with physician diagnosed COPD in health administrative databases. *COPD:*  
47 *Journal of Chronic Obstructive Pulmonary Disease*. 2009;**6**(1541-2563 (Electronic); -  
48 1541-2563 (Linking)):338-94.  
49  
50

51 23. Gershon A, Wang C, Wilton A, Raut R, To T. Trends in chronic obstructive  
52 pulmonary disease prevalence, incidence, and mortality in Ontario, Canada, 1996 to 2007.  
53 *Arch Intern Med*. 2010;**170**(6):560-5.  
54  
55  
56  
57  
58  
59  
60

- 1  
2  
3  
4  
5  
6  
7  
8  
9  
10  
11  
12  
13  
14  
15  
16  
17  
18  
19  
20  
21  
22  
23  
24  
25  
26  
27  
28  
29  
30  
31  
32  
33  
34  
35  
36  
37  
38  
39  
40  
41  
42  
43  
44  
45  
46  
47  
48  
49  
50  
51  
52  
53  
54  
55  
56  
57  
58  
59  
60
24. Gershon AS, Guan J, Victor JC, Goldstein R, To T. Quantifying health services use for chronic obstructive pulmonary disease. *American journal of respiratory and critical care medicine*. 2013;**187**(6):596-601.
25. Muggah E, Graves E, Bennett C, Manuel D. Ascertainment of chronic diseases using population health data: A comparison of health administrative data and patient self-report. *BMC Public Health*. 2013;**13**(1):16-.
26. Douglas G Manuel, Laura C Rosella, Thérèse A Stukel. Importance of accurately identifying chronic disease in studies using electronic health records. *Br Med J*. 2010;**341**(7770):440.
27. Green ME, Hogg W, Johnston S, Savage C, Glazier R et al. Assessing methods for measurement of clinical outcomes and performance in primary care practices. *BMC Health Services Research*, 2012; **12**:214.
28. van der Molen T. Co-morbidities of COPD in primary care: Frequency, relation to COPD, and treatment consequences. *Primary care respiratory journal : journal of the General Practice Airways Group*. 2010;**19**(4):326-34.
29. Burgel PR, Paillasseur JL, and Roche N. Identification of Clinical Phenotypes Using Cluster Analysis in COPD Patients with Multiple Comorbidities. *BioMed Research International* 2014; Article ID 420134.
30. O'Donnell DE, Hernandez P, Kaplan A, Aaron S, Bourbeau J et al. Canadian Thoracic Society Guidelines for the management of chronic obstructive pulmonary disease – 2008 update – highlights for primary care. *Canadian respiratory journal : Journal of the Canadian Thoracic Society*. 2008; **15**(Suppl A):1A-8A.

**Table 1. Prevalence of COPD by patient age and sex**

| Age group               | Male |        | Female |        | All  |        |
|-------------------------|------|--------|--------|--------|------|--------|
|                         | %    | n      | %      | n      | %    | n      |
| 18-29                   | 0.0  | 17110  | 0.0    | 25626  | 0.0  | 42736  |
| 30-39                   | 0.3  | 14516  | 0.3    | 23839  | 0.3  | 38355  |
| 40-49                   | 1.4  | 17508  | 1.3    | 24836  | 1.4  | 42344  |
| 50-59                   | 3.2  | 20562  | 3.3    | 26812  | 3.3  | 47374  |
| 60-69                   | 7.0  | 17208  | 6.2    | 20798  | 6.6  | 38006  |
| 70-79                   | 12.1 | 10446  | 10.6   | 13316  | 11.3 | 23762  |
| 80+                     | 18.1 | 6832   | 12.8   | 10937  | 14.8 | 17769  |
| All ages                | 4.5  | 104182 | 3.7    | 146164 | 4.0  | 250346 |
| Aged 40 years and older | 6.3  | 72556  | 5.5    | 96699  | 5.9  | 169255 |
| Aged 50 years and older | 7.9  | 55048  | 6.9    | 71863  | 7.4  | 126911 |

Note: Age-standardized prevalence for patients 18 years and older = 3.4%, and patients 40 years and older = 5.3% and patients 50 years and older = 6.9%.

**Figure 1. Prevalence of COPD for patients 40 years and older**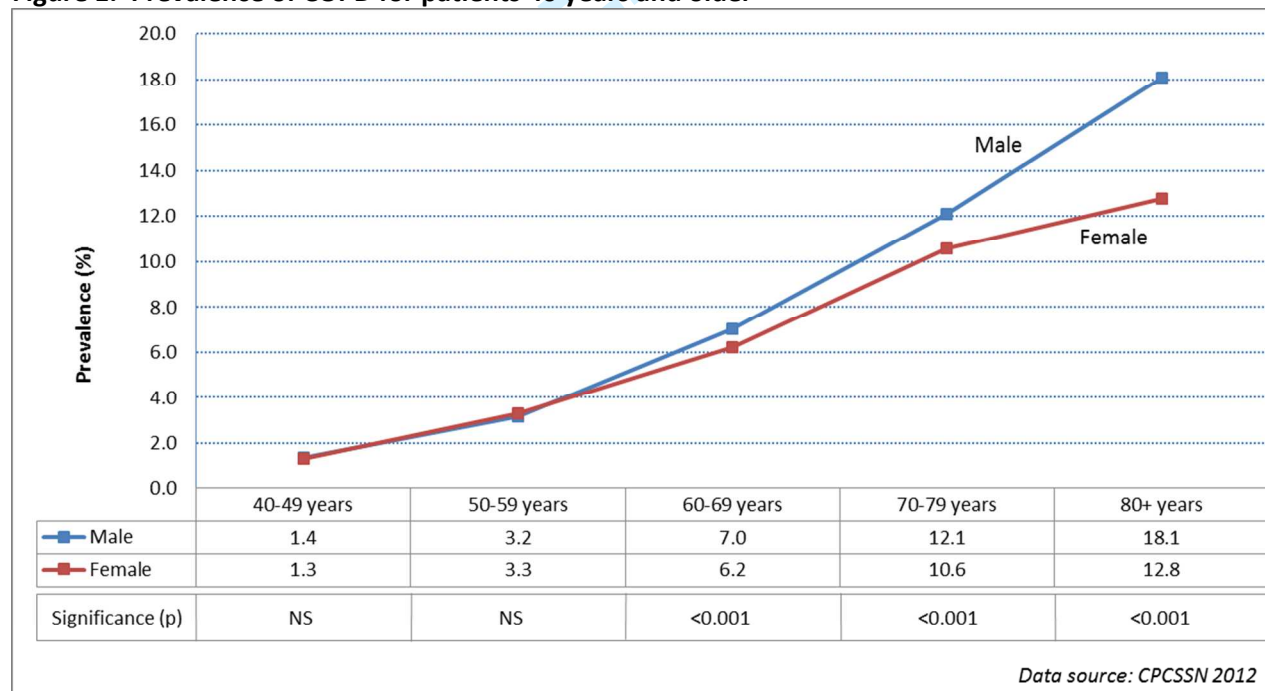

**Table 2. Comorbidity – age and sex adjusted prevalence ratio: A log-binomial approach**

| Comorbidity      | Parameter Estimates |              |              | p      |
|------------------|---------------------|--------------|--------------|--------|
|                  | Prev. Ratio         | Lower 95% CI | Upper 95% CI |        |
| Hypertension**   | 1.09                | 1.067        | 1.111        | <0.001 |
| Diabetes**       | 1.30                | 1.249        | 1.345        | <0.001 |
| Depression**     | 1.68                | 1.625        | 1.744        | <0.001 |
| Osteoarthritis** | 1.19                | 1.152        | 1.229        | <0.001 |
| Dementia*        | 1.11                | 1.026        | 1.191        | 0.008  |
| Epilepsy**       | 1.68                | 1.428        | 1.981        | <0.001 |
| Parkinsonism     | 0.90                | 0.730        | 1.109        | 0.321  |

Modeled the probability of each of the comorbid conditions, for which the predictor is COPD (yes/no), along with age and sex. Interpretation: People with COPD are 1.09 times as likely to be hypertensive as people without COPD, and so on.

\* p <0.01, \*\* p<0.001.

Confidential

**Table 3. Comorbidity: COPD vs. other conditions**

| Comorbidity                | Percent           |                  | Poisson Model: Parameter Estimates (n=250,346) |                 |                 |        |
|----------------------------|-------------------|------------------|------------------------------------------------|-----------------|-----------------|--------|
|                            | COPD=Yes<br>N (%) | COPD=No<br>N (%) | Prev. Ratio                                    | Lower 95%<br>CI | Upper 95%<br>CI | p      |
| COPD alone                 | 2338 (23.3)       | --               | --                                             | --              | --              | --     |
| 1 or more other conditions | 7705 (76.7)       | 68297 (66.2)     | 1.12                                           | 1.102           | 1.129           | <0.001 |
| 2 or more other conditions | 4156 (41.4)       | 34896 (33.8)     | 1.31                                           | 1.274           | 1.343           | <0.001 |
| 3 or more other conditions | 1436 (14.3)       | 8597 (8.3)       | 1.61                                           | 1.528           | 1.703           | <0.001 |
| 4 or more other conditions | 319 (3.2)         | 1450 (1.4)       | 1.90                                           | 1.674           | 2.147           | <0.001 |

**Note:** # of patients with COPD=10,043;  
# of patients without COPD but with at least one of the other CPCSSN conditions=103,193

Models included the predictor COPD (yes/no), along with age and sex.  
Interpretation: Patients with COPD are 1.12 times as likely to have one or more other chronic conditions as those without COPD, and so on.

**Figure 2. COPD Status vs. Mean Numbers of Other Comorbid Conditions, by Age**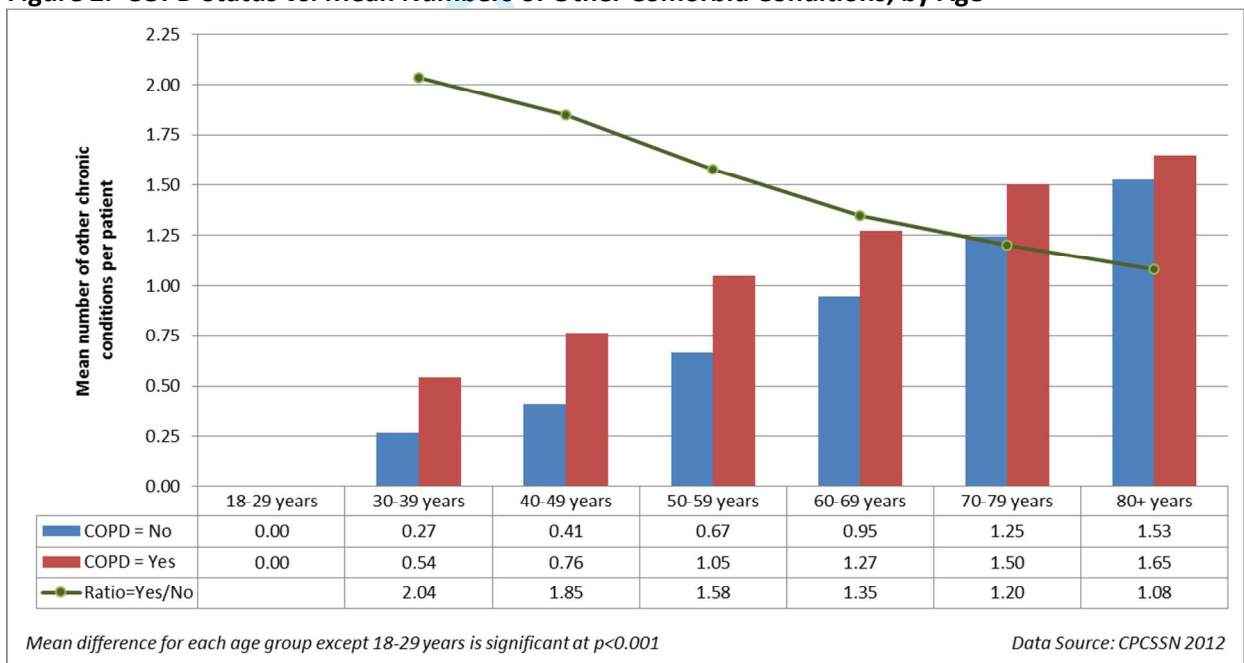

**Table 4. Use of medications by patients with COPD**

| Drug class                        | % (N=10,043) | Drugs         | % (N)       |
|-----------------------------------|--------------|---------------|-------------|
| Anticholinergics (ANTI)           | 63.0         | IPRATROPIUM   | 53.3 (6323) |
|                                   |              | TIOTROPIUM    | 58.9 (6323) |
| Inhaled Corticosteroids (ICS)     | 40.6         | BECLOMETASONE | 2.0 (4080)  |
|                                   |              | BUDESONIDE    | 22.7 (4080) |
|                                   |              | CICLESONIDE   | 10.8 (4080) |
|                                   |              | FLUTICASONE   | 55.5 (4080) |
|                                   |              | MOMETASONE    | 35.3(4080)  |
| Short Acting Beta Agonists (SABA) | 48.1         | SALBUTAMOL    | 96.4 (4829) |
|                                   |              | TERBUTALINE   | 5.8 (4829)  |
| Long Acting Beta Agonists (LABA)  | 38.2         | FENOTEROL     | 0.2 (3838)  |
|                                   |              | FORMOTEROL    | 41.2 (3838) |
|                                   |              | SALMETEROL    | 70.0 (3838) |
| Theophyllines (THEO)              | 1.7          | AMINOPHYLLINE | 4.0 (172)   |
|                                   |              | CHOLINE       | 1.7 (172)   |
|                                   |              | THEOPHYLLINE  | 96.0 (172)  |
| Other COPD meds (OCM)             | 4.9          | CROMOGLICIC   | 12.7 (487)  |
|                                   |              | MONTELUKAST   | 80.3 (487)  |
|                                   |              | OMALIZUMAB    | 0.2 (487)   |
|                                   |              | ROFLUMILAST   | 7.6 (487)   |
|                                   |              | ZAFIRLUKAST   | 2.5 (487)   |

**Table 5a. Use of multiple classes of medication**

| # of other classes | %     | N     |
|--------------------|-------|-------|
| 0 other class      | 16.8  | 1687* |
| 1 other class      | 20.8  | 2090  |
| 2 other classes    | 26.3  | 2643  |
| 3 other classes    | 23.2  | 2329  |
| 4+ other classes   | 12.9  | 1294  |
| Total              | 100.0 | 10043 |

\* Of 1687 COPD patients, 1372 (or 81.3%) were on non-COPD meds and 315 (or 18.7%) were not taking any meds.

**Table 5b. Use of multiple classes of medication**

| # of classes            | ANTI<br>(N=6323) | ICS<br>(N=4080) | LABA<br>(N=3838) | SABA<br>(N=4829) | THEO<br>(N=172) | OCM<br>(N=487) |
|-------------------------|------------------|-----------------|------------------|------------------|-----------------|----------------|
| Alone                   | 16.4             | 10.1            | 7.3              | 7.2              | 2.3             | 2.7            |
| 1 or more other classes | 83.6             | 89.9            | 92.7             | 92.8             | 97.7            | 97.3           |
| 2 or more other classes | 53.2             | 60.6            | 70.3             | 66.9             | 93.6            | 87.7           |
| 3 or more other classes | 19.9             | 28.5            | 32.2             | 25.7             | 83.1            | 66.1           |

STROBE Statement—checklist of items that should be included in reports of observational studies

We have reviewed the checklist for observational studies and feel all of the issues have been addressed in the paper.

|                              | Item No | Recommendation                                                                                                                                                                                                                                                                                                                                                                                                                                                                                                                                                                                                                                                                                   |
|------------------------------|---------|--------------------------------------------------------------------------------------------------------------------------------------------------------------------------------------------------------------------------------------------------------------------------------------------------------------------------------------------------------------------------------------------------------------------------------------------------------------------------------------------------------------------------------------------------------------------------------------------------------------------------------------------------------------------------------------------------|
| <b>YTitle and abstract</b>   | 1       | (a) Indicate the study's design with a commonly used term in the title or the abstract<br>(b) Provide in the abstract an informative and balanced summary of what was done and what was found                                                                                                                                                                                                                                                                                                                                                                                                                                                                                                    |
| <b>Introduction</b>          |         |                                                                                                                                                                                                                                                                                                                                                                                                                                                                                                                                                                                                                                                                                                  |
| Background/rationale         | 2       | Explain the scientific background and rationale for the investigation being reported                                                                                                                                                                                                                                                                                                                                                                                                                                                                                                                                                                                                             |
| Objectives                   | 3       | State specific objectives, including any prespecified hypotheses                                                                                                                                                                                                                                                                                                                                                                                                                                                                                                                                                                                                                                 |
| <b>Methods</b>               |         |                                                                                                                                                                                                                                                                                                                                                                                                                                                                                                                                                                                                                                                                                                  |
| Study design                 | 4       | Present key elements of study design early in the paper                                                                                                                                                                                                                                                                                                                                                                                                                                                                                                                                                                                                                                          |
| Setting                      | 5       | Describe the setting, locations, and relevant dates, including periods of recruitment, exposure, follow-up, and data collection                                                                                                                                                                                                                                                                                                                                                                                                                                                                                                                                                                  |
| Participants                 | 6       | (a) <i>Cohort study</i> —Give the eligibility criteria, and the sources and methods of selection of participants. Describe methods of follow-up<br><i>Case-control study</i> —Give the eligibility criteria, and the sources and methods of case ascertainment and control selection. Give the rationale for the choice of cases and controls<br><i>Cross-sectional study</i> —Give the eligibility criteria, and the sources and methods of selection of participants<br>(b) <i>Cohort study</i> —For matched studies, give matching criteria and number of exposed and unexposed<br><i>Case-control study</i> —For matched studies, give matching criteria and the number of controls per case |
| Variables                    | 7       | Clearly define all outcomes, exposures, predictors, potential confounders, and effect modifiers. Give diagnostic criteria, if applicable                                                                                                                                                                                                                                                                                                                                                                                                                                                                                                                                                         |
| Data sources/<br>measurement | 8*      | For each variable of interest, give sources of data and details of methods of assessment (measurement). Describe comparability of assessment methods if there is more than one group                                                                                                                                                                                                                                                                                                                                                                                                                                                                                                             |
| Bias                         | 9       | Describe any efforts to address potential sources of bias                                                                                                                                                                                                                                                                                                                                                                                                                                                                                                                                                                                                                                        |
| Study size                   | 10      | Explain how the study size was arrived at                                                                                                                                                                                                                                                                                                                                                                                                                                                                                                                                                                                                                                                        |
| Quantitative variables       | 11      | Explain how quantitative variables were handled in the analyses. If applicable, describe which groupings were chosen and why                                                                                                                                                                                                                                                                                                                                                                                                                                                                                                                                                                     |
| Statistical methods          | 12      | (a) Describe all statistical methods, including those used to control for confounding<br>(b) Describe any methods used to examine subgroups and interactions<br>(c) Explain how missing data were addressed<br>(d) <i>Cohort study</i> —If applicable, explain how loss to follow-up was addressed<br><i>Case-control study</i> —If applicable, explain how matching of cases and controls was addressed<br><i>Cross-sectional study</i> —If applicable, describe analytical methods taking account of sampling strategy<br>(e) Describe any sensitivity analyses                                                                                                                                |

Continued on next page

**Results**

|                  |     |                                                                                                                                                                                                                                                                                                                                                                                                               |
|------------------|-----|---------------------------------------------------------------------------------------------------------------------------------------------------------------------------------------------------------------------------------------------------------------------------------------------------------------------------------------------------------------------------------------------------------------|
| Participants     | 13* | (a) Report numbers of individuals at each stage of study—eg numbers potentially eligible, examined for eligibility, confirmed eligible, included in the study, completing follow-up, and analysed<br>(b) Give reasons for non-participation at each stage<br>(c) Consider use of a flow diagram                                                                                                               |
| Descriptive data | 14* | (a) Give characteristics of study participants (eg demographic, clinical, social) and information on exposures and potential confounders<br>(b) Indicate number of participants with missing data for each variable of interest<br>(c) <i>Cohort study</i> —Summarise follow-up time (eg, average and total amount)                                                                                           |
| Outcome data     | 15* | <i>Cohort study</i> —Report numbers of outcome events or summary measures over time<br><i>Case-control study</i> —Report numbers in each exposure category, or summary measures of exposure<br><i>Cross-sectional study</i> —Report numbers of outcome events or summary measures                                                                                                                             |
| Main results     | 16  | (a) Give unadjusted estimates and, if applicable, confounder-adjusted estimates and their precision (eg, 95% confidence interval). Make clear which confounders were adjusted for and why they were included<br>(b) Report category boundaries when continuous variables were categorized<br>(c) If relevant, consider translating estimates of relative risk into absolute risk for a meaningful time period |
| Other analyses   | 17  | Report other analyses done—eg analyses of subgroups and interactions, and sensitivity analyses                                                                                                                                                                                                                                                                                                                |

**Discussion**

|                  |    |                                                                                                                                                                            |
|------------------|----|----------------------------------------------------------------------------------------------------------------------------------------------------------------------------|
| Key results      | 18 | Summarise key results with reference to study objectives                                                                                                                   |
| Limitations      | 19 | Discuss limitations of the study, taking into account sources of potential bias or imprecision. Discuss both direction and magnitude of any potential bias                 |
| Interpretation   | 20 | Give a cautious overall interpretation of results considering objectives, limitations, multiplicity of analyses, results from similar studies, and other relevant evidence |
| Generalisability | 21 | Discuss the generalisability (external validity) of the study results                                                                                                      |

**Other information**

|         |    |                                                                                                                                                               |
|---------|----|---------------------------------------------------------------------------------------------------------------------------------------------------------------|
| Funding | 22 | Give the source of funding and the role of the funders for the present study and, if applicable, for the original study on which the present article is based |
|---------|----|---------------------------------------------------------------------------------------------------------------------------------------------------------------|

\*Give information separately for cases and controls in case-control studies and, if applicable, for exposed and unexposed groups in cohort and cross-sectional studies.

**Note:** An Explanation and Elaboration article discusses each checklist item and gives methodological background and published examples of transparent reporting. The STROBE checklist is best used in conjunction with this article (freely available on the Web sites of PLoS Medicine at <http://www.plosmedicine.org/>, Annals of Internal Medicine at <http://www.annals.org/>, and Epidemiology at <http://www.epidem.com/>). Information on the STROBE Initiative is available at [www.strobe-statement.org](http://www.strobe-statement.org).
